# Supplementary material
Source: Springer Nature journal article supplement (https://www.springermedizin.de/resource/supplementary/12885_2014_4959_MOESM2_ESM.pdf/9467818)
Supplement: MOESM2 [file 9467818]

**Table S2.** Clinicopathological characteristics of clear cell renal cell carcinomas (ccRCCs) in the validation cohort.

| Clinicopathological parameters        |              | Validation cohort (n=100) |
|---------------------------------------|--------------|---------------------------|
| Age                                   |              | 62.47±11.41               |
| Sex                                   | Male         | 68                        |
|                                       | Female       | 32                        |
| Tumor diameter (cm)                   |              | 5.67±3.05                 |
| Histological grades <sup>a</sup>      | G1           | 40                        |
|                                       | G2           | 40                        |
|                                       | G3           | 15                        |
|                                       | G4           | 5                         |
| Vascular involvement <sup>b</sup>     | Negative     | 48                        |
|                                       | Positive     | 52                        |
| Renal vein tumor thrombi <sup>c</sup> | Negative     | 72                        |
|                                       | Positive     | 28                        |
| Growth pattern                        | Expansive    | 92                        |
|                                       | Infiltrative | 8                         |
| Tumor necrosis                        | Negative     | 79                        |
|                                       | Positive     | 21                        |
| Invasion to renal pelvis              | Negative     | 90                        |
|                                       | Positive     | 10                        |
| Pathological TNM stage <sup>d</sup>   | Stage I      | 52                        |
|                                       | Stage II     | 11                        |
|                                       | Stage III    | 26                        |
|                                       | Stage IV     | 11                        |

<sup>a</sup>All the tumors were graded on the basis of previously described criteria [19]. <sup>b</sup>The presence or absence of vascular involvement was examined microscopically on slides stained with hematoxylin-eosin and elastica van Gieson. <sup>c</sup>The presence or absence of tumor thrombi in the main trunk of the renal vein was examined macroscopically. <sup>d</sup>All the patients were classified according to the pathological Tumor-Node-Metastasis (TNM) classification [20].
